# Supplementary material for: Modelling the impact of vaccination and sexual behavior change on reported cases of mpox in Washington D.C
Source: bioRxiv or medRxiv preprint supplement (doi:10.1101/2023.02.10.23285772), 2023-02-14
Supplement: Supplementary file [file media-1.pdf]

1 **Appendix for “Modelling the impact of vaccination and sexual behavior change on**  
2 **reported cases of mpox in Washington D.C.**

3 Parameterizing Behavior Change

4 We chose to analyze activity in individual subreddits (individual conversation boards on  
5 reddit, a social media discussion based website) as a proxy for risk awareness following prior  
6 work on HIV awareness<sup>26</sup>. We first searched for LGBTQ+ focused subreddits that (a) had more  
7 than 10,000 members, and (b) contained at least 5 posts or comment threads containing  
8 “monkeypox”, “mpox”, or “mpx”. We identified 7 sites: r/askgaybros, r/askgaybrosover30,  
9 r/askgaymen, r/gay, r/gaybros, r/lgbt, r/lgbtnews. For each of these subreddits, we collected posts  
10 by date, and the number of comments on each post, filtering out early posts concerning first  
11 reports of mpox in non-U.S. countries (Fig. S1A). A day that includes many posts with many  
12 comments indicates a high level of interest in mpox among the observed LGBTQ+ community.  
13 However, not all comments on a post occur on the day that the post is made, particularly since  
14 posts receiving many comments will stay on the “front page” of a subreddit for several days,  
15 meaning that they will be among the first post that site visitors see. Thus, to represent the interest  
16 over time that a single post can represent, we fit an exponential decay curve to the number of  
17 comments received each day by the most commented post containing “monkeypox” posted on  
18 these subreddits. We then spread the number of comments made on each post over days  
19 according to this exponential decay (Fig. S1B). Because posts that attract comments are shown to  
20 more users, the number of comments a post receives may be a exponential function of interest in  
21 a topic. Thus, we take a log transform of comments per day (Fig. S1C). Finally, we take a 2 week  
22 running average of  $\log(\text{comments})$  to generate risk perception among MSM over time (Fig.  
23 S1D). The maximum relative reduction in probability of one-time partnerships per day in our

24 model (40%) occurs on the day of maximum reddit activity (July 30<sup>th</sup>). This relative decrease is  
25 then scaled over time with reddit activity, e.g. we model a 20% reduction in one-time partnership  
26 probability on July 11<sup>th</sup> and September 24<sup>th</sup>, when reddit activity was half of the maximum value.

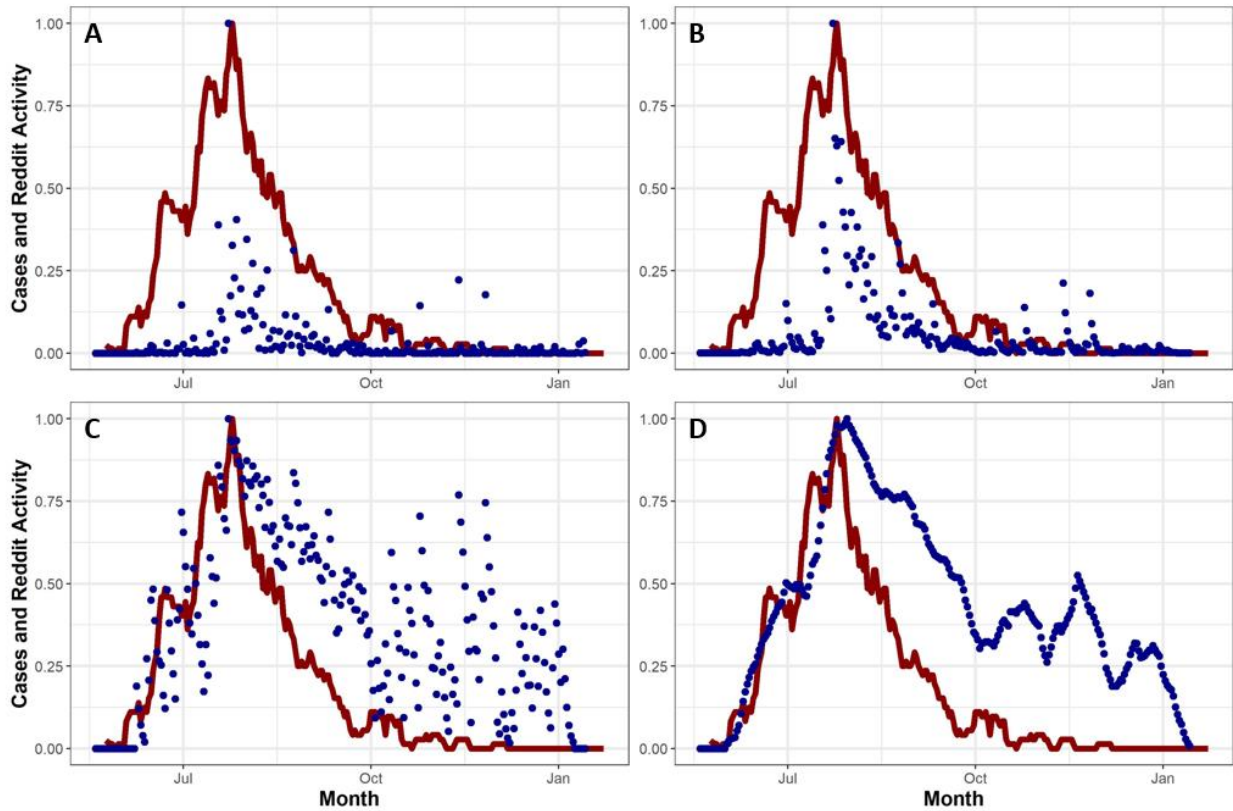

27  
28 **Figure S1:** Here, we transform reddit data into our model's relative risk perception metric. For the red  
29 line in all panels, the Y-axis represents 1 week running average of case reports from Washington D.C., set  
30 relative to 1, over months on the X-axis. For blue dots, Y-axis represents (A) number of posts + number  
31 of comments in examined subreddits containing mpox related terms, relative to 1, (B) Number of posts  
32 and comments, taking into account the exponential decay of comments over time, (C) the log transform of  
33 panel B, (D) the running 2 week average of panel C.

34 These the subreddits are not specific to D.C., and thus we needed to quantify regional  
35 variation in online mpox interest to ascertain whether subreddit searches needed to be corrected

36 for regional interest. Thus, we examined the proportion of Google searches containing  
37 “monkeypox”, “mpox”, or “mpx” from cities which experienced early mpox outbreaks (D.C.,  
38 New York, and Chicago) compared to cities that experienced later outbreaks or that did not  
39 experience a substantial outbreak (Atlanta, Houston, Phoenix, Seattle). We find that Google  
40 searches for these terms generally do not vary by location within the U.S. (Fig. S2), indicating  
41 that the timing of the general population’s risk perception of mpox did not depend on local  
42 trends. Further, we find that Google search interest peaks at a similar point to reddit activity.  
43 Thus we conclude that mpox risk perception is synchronous nationally, meaning that national  
44 trends can be used as a proxy for local risk perception.

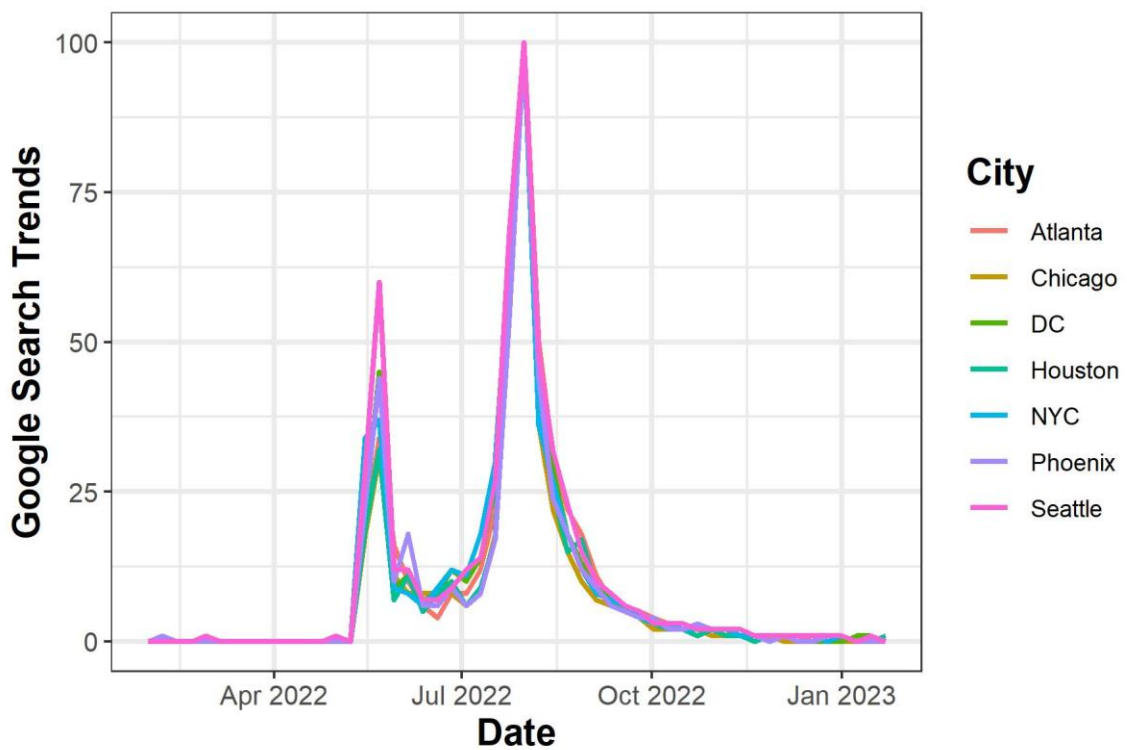

45  
46 **Figure S2:** Google search trends for “monkeypox” do not vary by location. The Y-axis represents the  
47 proportion of all Google searches from a location which contained the term “monkeypox”, relative to 1,  
48 over time on the X-axis. Colors indicate search location. The early peak corresponds to early news reports

49 on international mpox cases and initial cases reported in the United States. The main peak corresponds  
50 with the declaration of mpox as a public health emergency.

51 Fitting procedure

52 We drew most model parameters from published literature (Table S1). However, we fit  
53 five unknown parameters to Washington D.C. case data: the probability of transmission per  
54 contact ( $\mu$ ), the length in days of the pre-symptomatic infectious period ( $l$ ), the number of  
55 individuals infected with mpox virus at the Capital Pride Parade/Festival, occurring on June 11-  
56 12 ( $\epsilon$ ), the maximum percent reduction in probability of one-time sexual contact per day in  
57 response to the mpox outbreak ( $\omega$ ), and the proportion of administered vaccine doses reported by  
58 Washington D.C. that went to the modeled population rather than non-msm or non-resident  
59 commuters. When fitting to D.C. case data, we removed all case reports occurring in cisgendered  
60 women (defined as case reports where both sex at birth and gender identity were reported as  
61 female).

62 To increase the efficiency of our fitting procedure, we fit parameters over two different  
63 time periods. We first ran the model from May 21 – Jul 10. This period encompasses the Capital  
64 Pride Parade/Festival and the period during which individuals who contracted mpox at pride  
65 would develop symptoms and report for testing. However, this period occurs before large  
66 numbers of individuals were vaccinated or a large proportion of the population were aware of the  
67 risk of mpox (by our reddit post metric). Thus, we set behavior change and vaccination to zero,  
68 and fit all other parameters to this 50 day period. We conducted a grid search, running the model  
69 across a range of values for these three parameters ( $\mu=[0.6,0.90]$ ,  $l=[1,4]$ ,  $\epsilon=[0,60]$ ). We then  
70 selected the combination of parameters that minimized the negative log likelihood (nll) of  
71 median cumulative cases over time in the model generating observed cumulative cases over time

72 reported in Washington D.C. (using a Poisson distribution). When fitting, we ran each parameter  
73 combination for 60 simulations. We performed this procedure to a parameter interval of 0.1 for  
74  $\mu$ , 10 for  $\varepsilon$ , and 1 for  $l$ . We found that over this time period the best fit parameter set included an  
75 80% probability of transmission per sex act, a 4 day latent period, and 40 individuals infected at  
76 D.C. pride.

77 We thus set  $\varepsilon = 40$ ,  $\mu = 0.8$  and  $l = 4$  and then ran our model from May 21 – December  
78 10. This time period includes the decline of daily case reports, and so should inform intervention  
79 parameters. Thus, we again conducted a grid search, running the model across a range of values  
80 for maximum behavior change and proportion of reported vaccines administered to the modeled  
81 population ( $\omega=[0.3,0.7]$ ,  $\theta=[0.5,1.0]$ ). We performed this procedure to a parameter interval of  
82 0.1 for  $\mu$  and  $\theta$ . We found that the best fitting parameter set slightly underestimated case reports  
83 in the early stages of the outbreak, and slightly overestimated case reports in the later stages of  
84 the outbreak. Thus, we varied  $\mu$  and  $\omega$  over smaller intervals, before maximizing likelihood at  
85  $\varepsilon = 40$ ,  $\mu = 0.875$ ,  $l = 4$ ,  $\omega = 0.4$  and  $\theta = 1.0$ .

86 To test the likelihood of the outbreak ending entirely due to infection-driven herd  
87 immunity, we repeated the above fitting process while holding behavior change and vaccine  
88 administration at 0 ( $\omega = 0$  and  $\theta = 0$ ).

89

90 Table S1: model parameters

| <b>Parameter Description</b>                                                                         | <b>Value</b>         | <b>Source</b>                          |
|------------------------------------------------------------------------------------------------------|----------------------|----------------------------------------|
| <b>Initial Conditions</b>                                                                            |                      |                                        |
| Population size                                                                                      | 37,400               | Grey et al. 2016                       |
| Initial number infectious individuals                                                                | 5                    | Model Assumption                       |
| Date seeded with initial infections                                                                  | May 21 <sup>th</sup> | Case report data                       |
| Number individuals infected at D.C. pride                                                            | 40                   | Fit to case report data                |
| <b>Sexual Network Parameters</b>                                                                     |                      |                                        |
| Proportion individuals with 0 main and 0 casual partners                                             | 0.471                | Jenness et al. 2017                    |
| Proportion individuals with 0 main and 1 casual partners                                             | 0.167                | Jenness et al. 2017                    |
| Proportion individuals with 0 main and 2 casual partners                                             | 0.074                | Jenness et al. 2017                    |
| Proportion individuals with 1 main and 0 casual partners                                             | 0.220                | Jenness et al. 2017                    |
| Proportion individuals with 1 main and 1 casual partners                                             | 0.047                | Jenness et al. 2017                    |
| Proportion individuals with 1 main and 2 casual partners                                             | 0.021                | Jenness et al. 2017                    |
| Mean duration of Main partnerships                                                                   | 407 days             | Jenness et al. 2017                    |
| Mean duration of Casual partnerships                                                                 | 166 days             | Jenness et al. 2017                    |
| Probability per day of individual with 0 casual and 0 main partners having a one-time sexual contact | 0.0093               | Jenness et al. 2017, Weiss et al. 2020 |
| Probability per day of individual with 1 casual and 0 main partners having a one-time sexual contact | 0.012                | Jenness et al. 2017, Weiss et al. 2020 |
| Probability per day of individual with 2 casual and 0 main partners having a one-time sexual contact | 0.012                | Jenness et al. 2017, Weiss et al. 2020 |
| Probability per day of individual with 0 casual and 1 main partners having a one-time sexual contact | 0.0080               | Jenness et al. 2017, Weiss et al. 2020 |
| Probability per day of individual with 1 casual and 1                                                | 0.0079               | Jenness et al. 2017, Weiss et al. 2020 |

Modelling mpox vaccination and behavior

|                                                                                                      |        |                                        |
|------------------------------------------------------------------------------------------------------|--------|----------------------------------------|
| main partners having a one-time sexual contact                                                       |        |                                        |
| Probability per day of individual with 2 casual and 1 main partners having a one-time sexual contact | 0.0079 | Jenness et al. 2017, Weiss et al. 2020 |
| Probability per day of individual in activity group 1 having a one-time sexual contact               | 0      | Jenness et al. 2017                    |
| Probability per day of individual in activity group 2 having a one-time sexual contact               | 0.001  | Jenness et al. 2017                    |
| Probability per day of individual in activity group 3 having a one-time sexual contact               | 0.0054 | Jenness et al. 2017                    |
| Probability per day of individual in activity group 4 having a one-time sexual contact               | 0.01   | Jenness et al. 2017                    |
| Probability per day of individual in activity group 5 having a one-time sexual contact               | 0.032  | Jenness et al. 2017                    |
| Probability per day of individual in activity group 6 having a one-time sexual contact               | 0.29   | Weiss et al. 2020                      |
| Proportion of the population in activity groups 1-5 each                                             | 0.19   | Jenness et al. 2017, Weiss et al. 2020 |
| Proportion of the population in activity group 6                                                     | 0.05   | Jenness et al. 2017, Weiss et al. 2020 |
| Mean square root of age difference between Main partners                                             | 0.464  | Jenness et al. 2017                    |
| Mean square root of age difference between Casual partners                                           | 0.586  | Jenness et al. 2017                    |
| Mean square root of age difference between one-time partners                                         | 0.544  | Jenness et al. 2017                    |
| Proportion of population who are exclusively insertive                                               | 0.242  | Jenness et al. 2017                    |

|                                                                                                 |                                                                                                       |                         |
|-------------------------------------------------------------------------------------------------|-------------------------------------------------------------------------------------------------------|-------------------------|
| Proportion of population who are exclusively receptive                                          | 0.321                                                                                                 | Jenness et al. 2017     |
| Proportion of population who are versatile                                                      | 0.437                                                                                                 | Jenness et al. 2017     |
| Probability of having sexual contact per timestep with Main partner                             | 0.22                                                                                                  | Jenness et al. 2017     |
| Probability of having sexual contact per timestep with Casual partner                           | 0.14                                                                                                  | Jenness et al. 2017     |
| Probability of having sexual contact per timestep with one-time partner                         | 1                                                                                                     | Jenness et al. 2017     |
| <b>Natural History Parameters</b>                                                               |                                                                                                       |                         |
| Probability of transmission per sexual contact                                                  | 0.875                                                                                                 | Fit to case report data |
| Mean duration of post-exposure, pre-symptomatic period                                          | 7.6 days                                                                                              | Charniga et al. 2022    |
| Mean duration of pre-symptomatic infectious period                                              | 4 days                                                                                                | Fit to case report data |
| Mean duration of infectious period                                                              | 27 days                                                                                               | Spicknall et al. 2022   |
| <b>Treatment Seeking and Vaccine Parameters</b>                                                 |                                                                                                       |                         |
| Probability of seeking treatment                                                                | 0.8                                                                                                   | Farley et al. 2003      |
| Duration of infectious period if seeking treatment (time until medical attention post-symptoms) | 15 days on day 1, linearly decreases to 5.0 days on day 42, stays at 5.0 days for rest of simulation. | Figure S3               |
| Vaccine efficacy before second dose                                                             | 37%                                                                                                   | Payne et al. 2022       |
| Vaccine efficacy after second dose                                                              | 69%                                                                                                   | Payne et al. 2022       |
| Minimum Time between first and second dose                                                      | 28 days                                                                                               |                         |
| <b>Behavior Change Parameters</b>                                                               |                                                                                                       |                         |
| Maximum percent reduction in daily probability of forming one-time sexual partnerships.         | 40%                                                                                                   | Fit to case report data |



92 Table S2: Vaccination first-dose administration data for Washington D.C. Doses in first four  
 93 rows contain only doses used for post-exposure prophylaxis and so were not included in our  
 94 model.

| <b>Start Date</b>  | <b>End Date</b>    | <b>First Doses Given</b> | <b>Second Doses Given</b> |
|--------------------|--------------------|--------------------------|---------------------------|
| May 29, 2022       | June 4, 2022       | 1                        | 0                         |
| June 5, 2022       | June 11, 2022      | 23                       | 0                         |
| June 12, 2022      | June 18, 2022      | 18                       | 0                         |
| June 19, 2022      | June 25, 2022      | 16                       | 0                         |
| June 26, 2022      | July 2, 2022       | 319                      | 0                         |
| July 3, 2022       | July 9, 2022       | 627                      | 15                        |
| July 10, 2022      | July 16, 2022      | 938                      | 13                        |
| July 17, 2022      | July 23, 2022      | 3179                     | 32                        |
| July 24, 2022      | July 30, 2022      | 3433                     | 64                        |
| July 31, 2022      | August 6, 2022     | 4481                     | 78                        |
| August 7, 2022     | August 13, 2022    | 2723                     | 279                       |
| August 14, 2022    | August 20, 2022    | 1303                     | 377                       |
| August 21, 2022    | August 27, 2022    | 1739                     | 2791                      |
| August 28, 2022    | September 3, 2022  | 1060                     | 3674                      |
| September 4, 2022  | September 10, 2022 | 994                      | 2485                      |
| September 11, 2022 | September 17, 2022 | 924                      | 2050                      |
| September 18, 2022 | September 24, 2022 | 486                      | 2049                      |
| September 25, 2022 | October 1, 2022    | 165                      | 325                       |
| October 2, 2022    | October 8, 2022    | 129                      | 388                       |
| October 9, 2022    | October 15, 2022   | 101                      | 335                       |
| October 16, 2022   | October 22, 2022   | 83                       | 235                       |
| October 23, 2022   | October 29, 2022   | 82                       | 155                       |
| October 30, 2022   | November 5, 2022   | 69                       | 139                       |
| November 6, 2022   | November 12, 2022  | 51                       | 87                        |
| November 13, 2022  | November 19, 2022  | 39                       | 77                        |
| November 20, 2022  | November 26, 2022  | 22                       | 44                        |
| November 27, 2022  | December 3, 2022   | 30                       | 70                        |
| December 4, 2022   | December 10, 2022  | 29                       | 61                        |

95

96

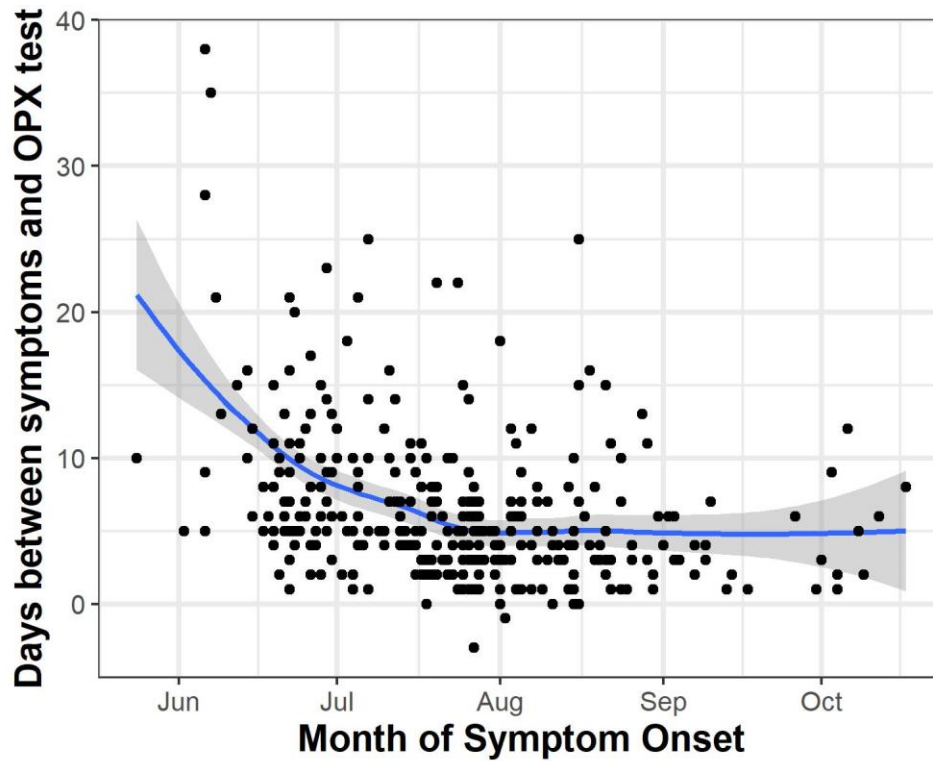

97

98 **Figure S3:** Time between symptom onset and being tested for orthopoxvirus (OPX) decreased

99 over the course of the outbreak. Y-axis shows the delay between symptom onset and testing for

100 orthopoxvirus, over month of illness onset on the X-axis from May 24<sup>th</sup>, 2022 to Oct. 17<sup>th</sup>, 2022.

101 Points represent individual case reports, while the blue line and transparent band represent mean

102 and 95% confidence interval of the smoothed function of the mean. All case reports are from

103 Washington D.C.

104

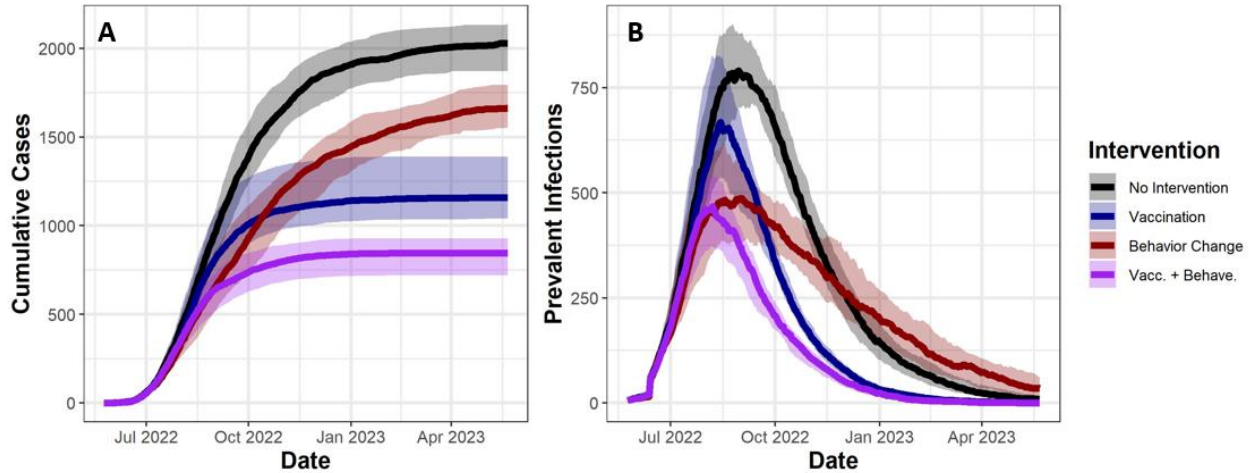

105

106 **Figure S4:** Here, we shrink the effective population size in our model from 37,400 to 20,000 as  
 107 we assume that a proportion of MSM are not involved in the relevant sexual mixing pool. This  
 108 means that vaccinations can reach a larger portion of the population, and that infection-driven  
 109 herd immunity will be achieved faster. We find that the our core finding are unchanged: behavior  
 110 change averts cases before vaccination, but vaccination averts more cases overall. (A) Y-axis  
 111 shows model estimates of cumulative cases (i.e. individuals who are diagnosed with mpox), over  
 112 time on the X-axis from May 21<sup>st</sup> 2022 to May 21<sup>st</sup> 2023. (B) Y-axis shows prevalent infections,  
 113 over time on the X-axis. Solid lines indicate median values from 120 simulations, while  
 114 transparent bands represent interquartile ranges. Colors indicate intervention combinations.

115

116

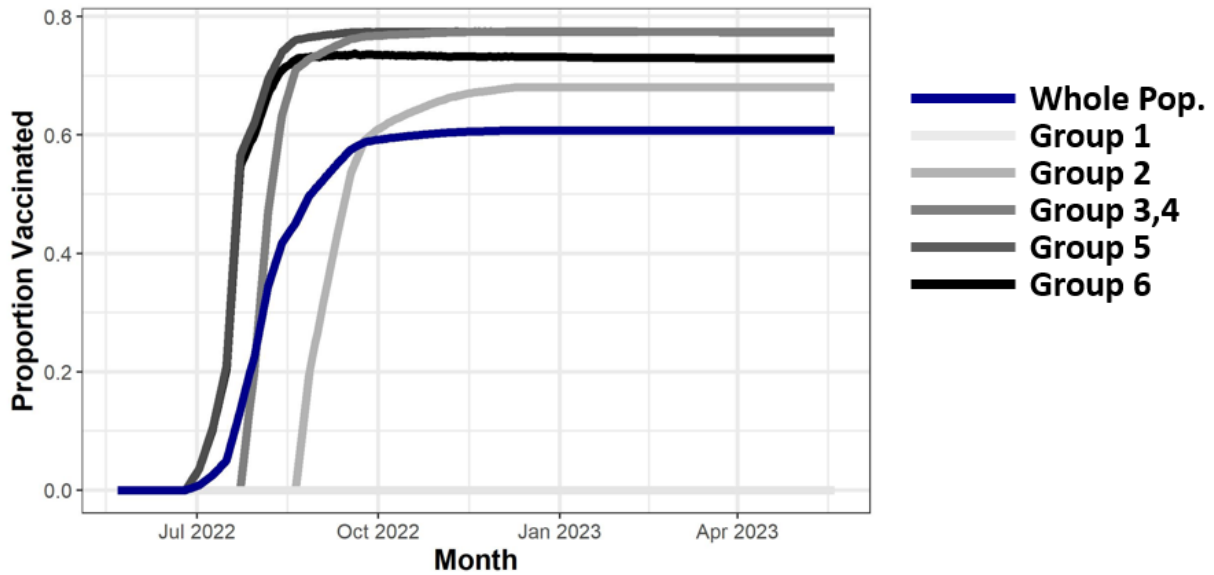

117

118 **Figure S5:** Proportion of sexual activity groups vaccinated over time. Y-axis shows proportion  
119 of the whole population or individual activity groups (group 1 = lowest activity, group 6 =  
120 highest activity) that are vaccinated with either 1 or 2 doses, over time on the X-axis. Groups 3  
121 and 4 share 1 line because their trends overlap.

122

123

124

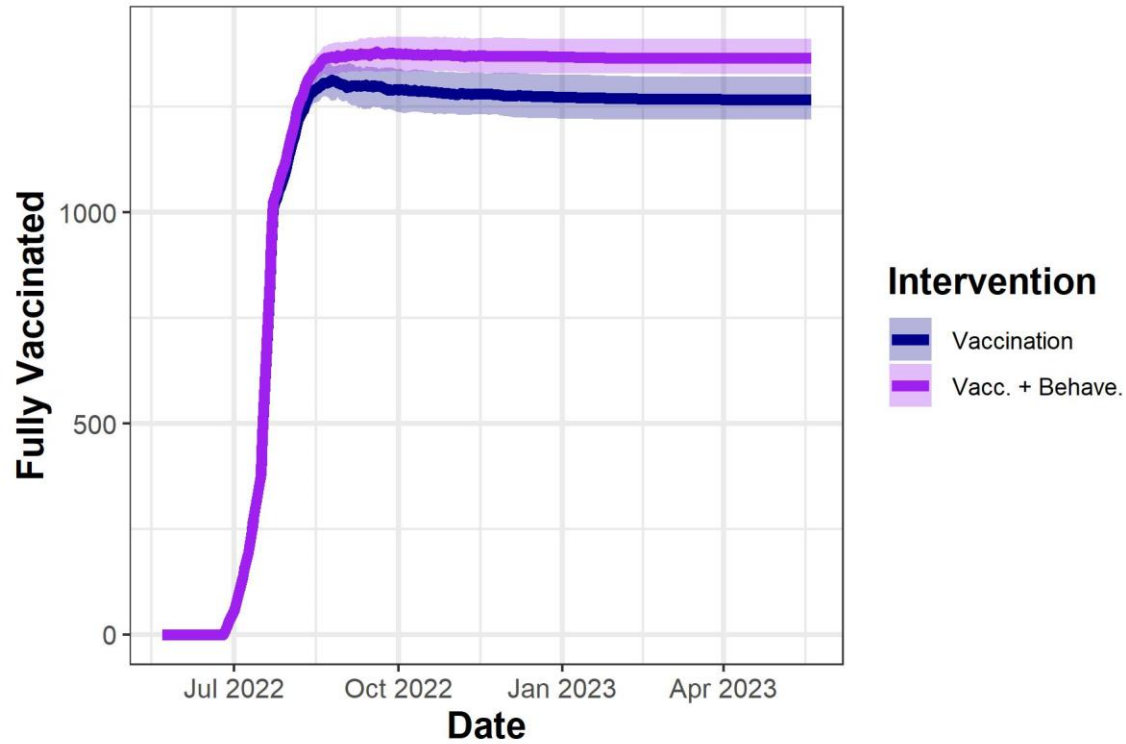

125

126 **Figure S6:** Y-axis shows the number of individuals in the most sexually active group who are

127 fully vaccinated, over date on the X-axis. Solid lines indicate median values from 120

128 simulations, while transparent bands outlined by thin lines represent interquartile ranges.

129 Decreases in number of individuals who are fully vaccinated occurring from August 2022

130 onwards represent individuals who experience break-through infections, and thus are no longer

131 counted in the vaccinated class.

132

133

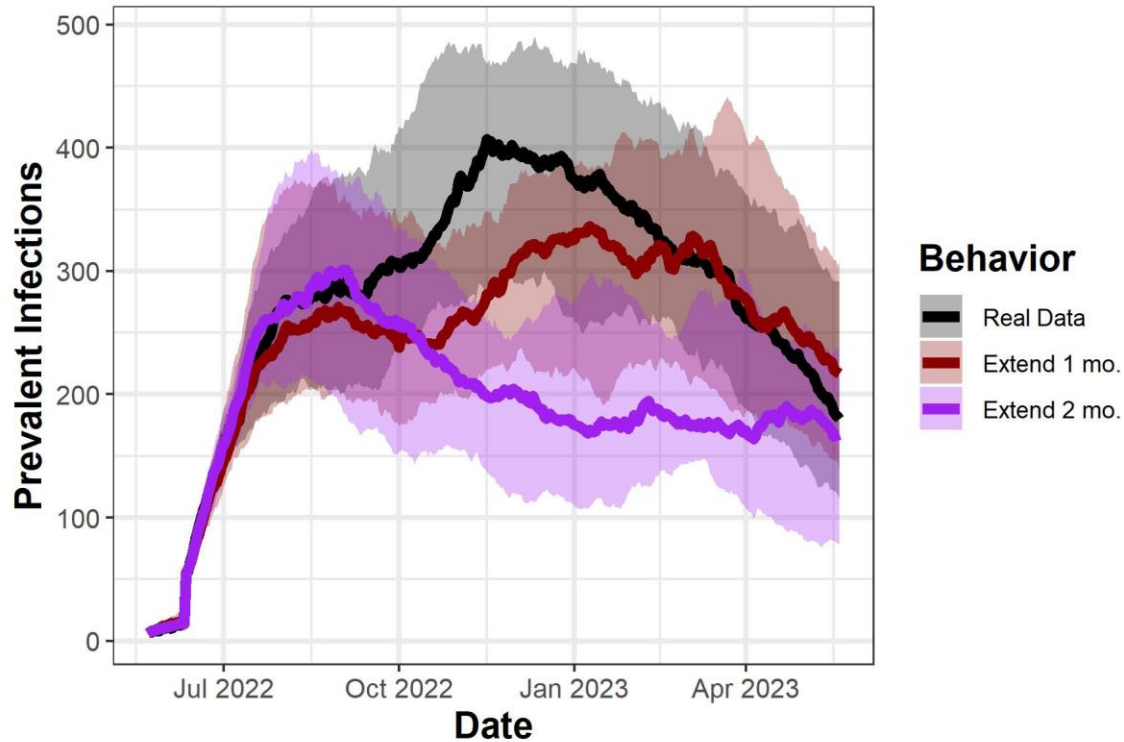

134

135 **Figure S7:** Behavior change alone would not have been able to end the outbreak within a year,  
 136 even when we extend the time period of maximum reduction of one-time partnership  
 137 probabilities. Y-axis shows prevalent infections, over time on the X-axis. Solid lines indicate  
 138 median values from 120 simulations, while transparent bands represent interquartile ranges.  
 139 Colors indicate the length of time over which individuals maintain a 40% reduction in one-time  
 140 partnership probabilities. Black indicates data based on reddit activity, for red we extend  
 141 maximum partnership reduction by one month, and for purple we extend maximum partnership  
 142 reduction by two months.

143

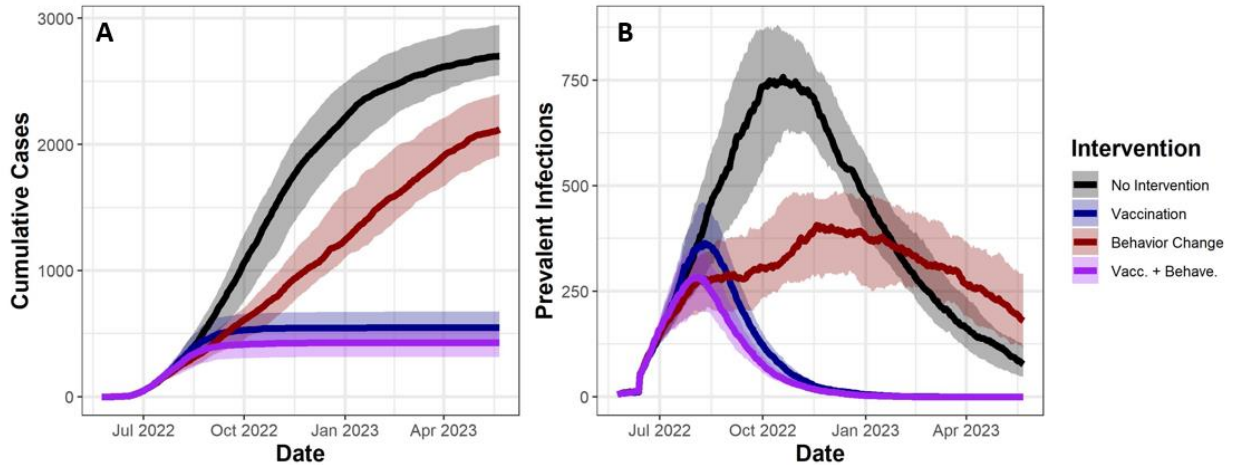

144

145 **Figure S7:** Here, we assume a vaccine efficacy of 85% after first dose and 95% after second  
146 dose based on <sup>17</sup>, rather than 37% and 69% vaccine effectiveness, respectively, used in the main  
147 text <sup>16</sup>. We find that the our core finding are unchanged: behavior change averts cases before  
148 vaccination, but vaccination averts more cases overall. (A) Y-axis shows model estimates of  
149 cumulative cases (i.e. individuals who are diagnosed with mpox), over time on the X-axis from  
150 May 21<sup>st</sup> 2022 to May 21<sup>st</sup> 2023. (B) Y-axis shows prevalent infections, over time on the X-axis.  
151 Solid lines indicate median values from 120 simulations, while transparent bands represent  
152 interquartile ranges. Colors indicate intervention combinations.

153
